# Supplementary material for: Phosphaturic Mesenchymal Tumors: Rethinking the Clinical Diagnosis and Surgical Treatment
Source: MDPI journal article supplement (doi:10.3390/jcm12010252), 2022-12-29
Supplement: s1 [file s1]

**Supplemental Table S1: General information**

| Patient | Gender | Age | Duration<br>of disease<br>(month) | Location                   | Tumor<br>size(cm) | Pathological<br>fracture | Treatment<br>before<br>diagnosis | Therapeutic<br>method | Duration of<br>Follow-up<br>(month) | Preoperati<br>ve MSTS<br>score | Postoperat<br>ive MSTS<br>score | Preoperati<br>ve VAS<br>score | Postoperat<br>ive VAS<br>score | Recurrence or<br>metastasis |
|---------|--------|-----|-----------------------------------|----------------------------|-------------------|--------------------------|----------------------------------|-----------------------|-------------------------------------|--------------------------------|---------------------------------|-------------------------------|--------------------------------|-----------------------------|
| 1       | M      | 60  | 24                                | humerus                    | 5.3               | yes                      | surgery                          | MAAEC                 | 43                                  | 17                             | 28                              | 4                             | 0                              | no                          |
| 2       | M      | 40  | 16                                | soft tissue of<br>shoulder | 2.5               | no                       | medication                       | RR                    | 55                                  | 13                             | 30                              | 6                             | 0                              | no                          |
| 3       | M      | 47  | 34                                | femur                      | 1.8               | no                       | medication                       | MAAEC                 | 27                                  | 15                             | 29                              | 5                             | 0                              | no                          |
| 4       | F      | 27  | 32                                | femur                      | 4.5               | yes                      | surgery                          | RR                    | 34                                  | 13                             | 28                              | 6                             | 1                              | no                          |
| 5       | F      | 57  | 20                                | tibia                      | 3.8               | yes                      | medication                       | MAAEC                 | 73                                  | 10                             | 28                              | 7                             | 0                              | no                          |
| 6       | M      | 32  | 13                                | soft tissue of<br>thigh    | 3.4               | yes                      | medication                       | RR                    | 42                                  | 18                             | 30                              | 4                             | 0                              | no                          |
| 7       | F      | 55  | 18                                | ilium                      | 2.6               | yes                      | medication                       | MAAEC                 | 29                                  | 16                             | 29                              | 5                             | 1                              | no                          |
| 8       | M      | 29  | 9                                 | femur                      | 1.7               | no                       | surgery                          | MAAEC                 | 37                                  | 21                             | 30                              | 4                             | 0                              | no                          |
| 9       | F      | 44  | 13                                | ilium                      | 5.5               | yes                      | medication                       | MAAEC                 | 43                                  | 17                             | 28                              | 5                             | 1                              | no                          |
| 10      | F      | 59  | 35                                | femur                      | 4.2               | yes                      | surgery                          | MAAEC                 | 57                                  | 16                             | 29                              | 6                             | 1                              | no                          |
| 11      | F      | 12  | 25                                | scapula                    | 6.3               | yes                      | medication                       | RR                    | 64                                  | 14                             | 30                              | 5                             | 0                              | no                          |
| 12      | F      | 38  | 15                                | femur                      | 4.5               | yes                      | surgery                          | MAAEC                 | 50                                  | 14                             | 29                              | 6                             | 1                              | no                          |

**MAAEC,microwave ablation-assisted extended curettage; RR,radical resection**

**Supplemental Table S2: Biochemical examination**

| Patient      | Phosphorus      |        |      |       | Calcium         |        | AKP           |        |       | PTH        |        | TPINP           |        |
|--------------|-----------------|--------|------|-------|-----------------|--------|---------------|--------|-------|------------|--------|-----------------|--------|
|              | Preop           | Postop |      |       |                 |        | Preop         | Postop |       |            |        |                 |        |
|              |                 | 3day   | 7day | 14day | Preop           | Postop |               | 3day   | 14day | Preop      | Postop | Preop           | Postop |
| 1            | 0.31            | 0.66   | 0.97 | 1.21  | 2.24            | 2.14   | 234.1         | 154.6  | 76.8  | 46.05      | 50.6   | 164.9           | 56.9   |
| 2            | 0.54            | 0.75   | 1.12 | 1.43  | 2.14            | 2.16   | 323.5         | 218.3  | 113.5 | 60.7       | 53.5   | 185.5           | 86.2   |
| 3            | 0.42            | 0.72   | 1.04 | 1.14  | 2.42            | 2.33   | 218.4         | 98.6   | 58.6  | 82.55      | 57.3   | 81.53           | 65.8   |
| 4            | 0.5             | 0.64   | 0.92 | 1.25  | 2.24            | 2.52   | 164.9         | 76.5   | 73.5  | 511        | 73.5   | 70.29           | 60.4   |
| 5            | 0.35            | 0.69   | 0.86 | 1.45  | 2.42            | 2.16   | 235.6         | 121.5  | 86.4  | 53.7       | 47.6   | 31.55           | 44.6   |
| 6            | 0.36            | 0.87   | 1.18 | 1.35  | 2.37            | 2.24   | 575           | 208.7  | 113.4 | 77.4       | 55.4   | 138.9           | 87.3   |
| 7            | 0.59            | 0.88   | 1.01 | 1.34  | 2.09            | 2.01   | 337.4         | 235.8  | 120.6 | 68.9       | 71.4   | 124.7           | 90.8   |
| 8            | 0.42            | 0.62   | 0.87 | 1.23  | 2.15            | 2.15   | 344.6         | 189.7  | 89.7  | 52.02      | 48.7   | 56.8            | 50.4   |
| 9            | 0.38            | 0.67   | 0.93 | 1.16  | 2.24            | 2.05   | 143.4         | 90.5   | 68.3  | 59.3       | 57     | 66.9            | 53.8   |
| 10           | 0.26            | 0.47   | 1.02 | 1.38  | 2.11            | 2.08   | 191.5         | 121.5  | 110.4 | 81.11      | 69.2   | 30.63           | 35.6   |
| 11           | 0.45            | 0.78   | 1.04 | 1.45  | 2.15            | 2.21   | 431.4         | 223.6  | 123   | 74.9       | 66.3   | 143.8           | 75.5   |
| 12           | 0.41            | 0.67   | 1.07 | 1.31  | 2.23            | 2.25   | 216.5         | 154.1  | 90.8  | 68.3       | 60.5   | 121.6           | 86.5   |
| Normal range | 0.86-1.78mmol/L |        |      |       | 2.00-2.60mmol/L |        | 45.0-125.0U/L |        |       | 15-65pg/ml |        | 9.06-76.24ng/ml |        |
